# Supplementary material for: Longitudinal Association Of Atopic Dermatitis Progression And Keratin 6A
Source: Research Square preprint supplement (doi:10.21203/rs.3.rs-1416536/v1), 2022-03-15
Supplement: Supplementary file 1 [file 04f67637f2b15e1b12e9ba50.docx]

| Table 1. Pairwise correlations for the KRT6A SNPs with minor allele frequency of at least 5%. | | | | | | | | | | | | | | | | | | | | | | | | | | | | | | | | | | | | | | | | | | | | | | |
| --- | --- | --- | --- | --- | --- | --- | --- | --- | --- | --- | --- | --- | --- | --- | --- | --- | --- | --- | --- | --- | --- | --- | --- | --- | --- | --- | --- | --- | --- | --- | --- | --- | --- | --- | --- | --- | --- | --- | --- | --- | --- | --- | --- | --- | --- | --- |
|  | rs177079 | | rs188463 | | rs188464 | | rs298117 | | rs298118 | | rs298119 | | rs298120 | | rs298121 | | rs298122 | | rs376545 | | rs711317 | | rs1053854 | | rs1053857 | | rs1054122 | | rs1063931 | | rs3907935 | | rs4761912 | | rs4761913 | rs11540301 | rs12578949 | rs12581120 | rs12581781 | rs17845411 | rs28667515 | rs61510718 | rs62617088 | rs1133153 | rs3858630 | rs3858631 |
| rs177079 | -- | 0.24 | | 0.24 | | 0.24 | | 0.97 | | 0.22 | | 0.20 | | 0.98 | | 0.98 | | 0.59 | | 0.42 | | 0.24 | | 0.24 | | 0.93 | | 0.14 | | 0.14 | | 0.14 | | 0.14 | | 0.03 | 0.13 | 0.03 | 0.14 | 0.12 | 0.24 | 0.05 | 0.03 | 0.24 | 0.14 | 0.07 |
| rs188463 | -- | -- | | 0.99 | | 0.99 | | 0.24 | | 0.88 | | 0.81 | | 0.24 | | 0.23 | | 0.41 | | 0.56 | | 0.99 | | 0.99 | | 0.22 | | 0.38 | | 0.38 | | 0.38 | | 0.38 | | 0.10 | 0.36 | 0.10 | 0.38 | 0.33 | 0.99 | 0.13 | 0.08 | 0.98 | 0.38 | 0.18 |
| rs188464 | -- | -- | | -- | | 0.99 | | 0.23 | | 0.88 | | 0.81 | | 0.24 | | 0.23 | | 0.41 | | 0.57 | | 0.98 | | 0.98 | | 0.23 | | 0.37 | | 0.38 | | 0.38 | | 0.38 | | 0.10 | 0.35 | 0.10 | 0.39 | 0.33 | 0.99 | 0.13 | 0.08 | 0.99 | 0.38 | 0.17 |
| rs298117 | -- | -- | | -- | | -- | | 0.23 | | 0.89 | | 0.81 | | 0.24 | | 0.23 | | 0.41 | | 0.56 | | 0.99 | | 0.99 | | 0.22 | | 0.38 | | 0.38 | | 0.39 | | 0.38 | | 0.10 | 0.36 | 0.10 | 0.39 | 0.33 | 0.99 | 0.13 | 0.08 | 0.98 | 0.39 | 0.18 |
| rs298118 | -- | -- | | -- | | -- | | -- | | 0.21 | | 0.19 | | 0.96 | | 0.97 | | 0.57 | | 0.41 | | 0.24 | | 0.24 | | 0.94 | | 0.14 | | 0.14 | | 0.14 | | 0.14 | | 0.03 | 0.13 | 0.03 | 0.14 | 0.12 | 0.24 | 0.05 | 0.03 | 0.23 | 0.14 | 0.06 |
| rs298119 | -- | -- | | -- | | -- | | -- | | -- | | 0.92 | | 0.21 | | 0.20 | | 0.36 | | 0.50 | | 0.88 | | 0.88 | | 0.20 | | 0.34 | | 0.34 | | 0.34 | | 0.34 | | 0.09 | 0.32 | 0.09 | 0.34 | 0.29 | 0.89 | 0.12 | 0.08 | 0.88 | 0.34 | 0.16 |
| rs298120 | -- | -- | | -- | | -- | | -- | | -- | | -- | | 0.19 | | 0.19 | | 0.33 | | 0.46 | | 0.81 | | 0.81 | | 0.19 | | 0.31 | | 0.32 | | 0.32 | | 0.32 | | 0.08 | 0.30 | 0.08 | 0.32 | 0.27 | 0.81 | 0.11 | 0.07 | 0.80 | 0.32 | 0.15 |
| rs298121 | -- | -- | | -- | | -- | | -- | | -- | | -- | | -- | | 0.97 | | 0.57 | | 0.42 | | 0.24 | | 0.24 | | 0.93 | | 0.14 | | 0.14 | | 0.14 | | 0.14 | | 0.03 | 0.13 | 0.03 | 0.14 | 0.12 | 0.24 | 0.05 | 0.03 | 0.24 | 0.14 | 0.07 |
| rs298122 | -- | -- | | -- | | -- | | -- | | -- | | -- | | -- | | -- | | 0.57 | | 0.41 | | 0.24 | | 0.24 | | 0.93 | | 0.14 | | 0.14 | | 0.14 | | 0.14 | | 0.04 | 0.13 | 0.04 | 0.14 | 0.12 | 0.23 | 0.05 | 0.03 | 0.23 | 0.14 | 0.07 |
| rs376545 | -- | -- | | -- | | -- | | -- | | -- | | -- | | -- | | -- | | -- | | 0.14 | | 0.40 | | 0.40 | | 0.55 | | 0.00 | | 0.00 | | 0.00 | | 0.00 | | 0.24 | 0.00 | 0.24 | 0.00 | 0.00 | 0.40 | 0.12 | 0.20 | 0.40 | 0.00 | 0.11 |
| rs711317 | -- | -- | | -- | | -- | | -- | | -- | | -- | | -- | | -- | | -- | | -- | | 0.56 | | 0.56 | | 0.40 | | 0.01 | | 0.01 | | 0.01 | | 0.01 | | 0.08 | 0.02 | 0.08 | 0.01 | 0.04 | 0.56 | 0.11 | 0.07 | 0.56 | 0.01 | 0.31 |
| rs1053854 | -- | -- | | -- | | -- | | -- | | -- | | -- | | -- | | -- | | -- | | -- | | -- | | 1.00 | | 0.22 | | 0.39 | | 0.39 | | 0.39 | | 0.39 | | 0.10 | 0.37 | 0.10 | 0.39 | 0.33 | 0.99 | 0.13 | 0.08 | 0.98 | 0.39 | 0.18 |
| rs1053857 | -- | -- | | -- | | -- | | -- | | -- | | -- | | -- | | -- | | -- | | -- | | -- | | -- | | 0.22 | | 0.39 | | 0.39 | | 0.39 | | 0.39 | | 0.10 | 0.37 | 0.10 | 0.39 | 0.33 | 0.99 | 0.13 | 0.08 | 0.98 | 0.39 | 0.18 |
| rs1054122 | -- | -- | | -- | | -- | | -- | | -- | | -- | | -- | | -- | | -- | | -- | | -- | | -- | | -- | | 0.14 | | 0.14 | | 0.14 | | 0.14 | | 0.03 | 0.13 | 0.03 | 0.14 | 0.12 | 0.22 | 0.05 | 0.03 | 0.23 | 0.14 | 0.06 |
| rs1063931 | -- | -- | | -- | | -- | | -- | | -- | | -- | | -- | | -- | | -- | | -- | | -- | | -- | | -- | | -- | | 1.00 | | 0.99 | | 1.00 | | 0.25 | 0.93 | 0.25 | 0.99 | 0.84 | 0.39 | 0.34 | 0.21 | 0.38 | 0.99 | 0.47 |
| rs3907935 | -- | -- | | -- | | -- | | -- | | -- | | -- | | -- | | -- | | -- | | -- | | -- | | -- | | -- | | -- | | -- | | 0.99 | | 1.00 | | 0.25 | 0.93 | 0.25 | 0.99 | 0.84 | 0.39 | 0.34 | 0.21 | 0.38 | 0.99 | 0.47 |
| rs4761912 | -- | -- | | -- | | -- | | -- | | -- | | -- | | -- | | -- | | -- | | -- | | -- | | -- | | -- | | -- | | -- | | -- | | 0.99 | | 0.24 | 0.93 | 0.24 | 0.99 | 0.84 | 0.38 | 0.34 | 0.21 | 0.38 | 0.99 | 0.47 |
| rs4761913 | -- | -- | | -- | | -- | | -- | | -- | | -- | | -- | | -- | | -- | | -- | | -- | | -- | | -- | | -- | | -- | | -- | | -- | | 0.25 | 0.93 | 0.25 | 0.99 | 0.84 | 0.39 | 0.34 | 0.21 | 0.38 | 0.99 | 0.47 |
| rs11540301 | -- | -- | | -- | | -- | | -- | | -- | | -- | | -- | | -- | | -- | | -- | | -- | | -- | | -- | | -- | | -- | | -- | | -- | | -- | 0.26 | 1.00 | 0.25 | 0.29 | 0.10 | 0.73 | 0.86 | 0.10 | 0.25 | 0.03 |
| rs12578949 | -- | -- | | -- | | -- | | -- | | -- | | -- | | -- | | -- | | -- | | -- | | -- | | -- | | -- | | -- | | -- | | -- | | -- | | -- | -- | 0.26 | 0.93 | 0.90 | 0.36 | 0.26 | 0.23 | 0.35 | 0.93 | 0.50 |
| rs12581120 | -- | -- | | -- | | -- | | -- | | -- | | -- | | -- | | -- | | -- | | -- | | -- | | -- | | -- | | -- | | -- | | -- | | -- | | -- | -- | -- | 0.25 | 0.29 | 0.10 | 0.73 | 0.86 | 0.10 | 0.25 | 0.03 |
| rs12581781 | -- | -- | | -- | | -- | | -- | | -- | | -- | | -- | | -- | | -- | | -- | | -- | | -- | | -- | | -- | | -- | | -- | | -- | | -- | -- | -- | -- | 0.85 | 0.38 | 0.34 | 0.22 | 0.39 | 0.99 | 0.46 |
| rs17845411 | -- | -- | | -- | | -- | | -- | | -- | | -- | | -- | | -- | | -- | | -- | | -- | | -- | | -- | | -- | | -- | | -- | | -- | | -- | -- | -- | -- | -- | 0.33 | 0.16 | 0.25 | 0.33 | 0.84 | 0.54 |
| rs28667515 | -- | -- | | -- | | -- | | -- | | -- | | -- | | -- | | -- | | -- | | -- | | -- | | -- | | -- | | -- | | -- | | -- | | -- | | -- | -- | -- | -- | -- | -- | 0.13 | 0.08 | 0.98 | 0.38 | 0.18 |
| rs61510718 | -- | -- | | -- | | -- | | -- | | -- | | -- | | -- | | -- | | -- | | -- | | -- | | -- | | -- | | -- | | -- | | -- | | -- | | -- | -- | -- | -- | -- | -- | -- | 0.63 | 0.13 | 0.34 | 0.04 |
| rs62617088 | -- | -- | | -- | | -- | | -- | | -- | | -- | | -- | | -- | | -- | | -- | | -- | | -- | | -- | | -- | | -- | | -- | | -- | | -- | -- | -- | -- | -- | -- | -- | -- | 0.08 | 0.22 | 0.02 |
| rs1133153 | -- | -- | | -- | | -- | | -- | | -- | | -- | | -- | | -- | | -- | | -- | | -- | | -- | | -- | | -- | | -- | | -- | | -- | | -- | -- | -- | -- | -- | -- | -- | -- | -- | 0.38 | 0.17 |
| rs3858630 | -- | -- | | -- | | -- | | -- | | -- | | -- | | -- | | -- | | -- | | -- | | -- | | -- | | -- | | -- | | -- | | -- | | -- | | -- | -- | -- | -- | -- | -- | -- | -- | -- | -- | 0.47 |
| rs3858631 | -- | -- | | -- | | -- | | -- | | -- | | -- | | -- | | -- | | -- | | -- | | -- | | -- | | -- | | -- | | -- | | -- | | -- | | -- | -- | -- | -- | -- | -- | -- | -- | -- | -- | -- |
